# Supplementary material for: A Na+conducting hydrogel for protection of organic electrochemical transistors
Source: Royal Society of Chemistry journal article supplement (doi:10.1039/c8tb00201k), 2018-01-01
Supplement: c8tb00201k1.pdf [file c8tb00201k1.pdf]

## Supporting Info

### A Na<sup>+</sup> conducting hydrogel for protection of organic electrochemical transistors

I. del Agua,<sup>a, b</sup> L. Porcarelli,<sup>a</sup> V. F. Curto,<sup>b, c</sup> A. Sanchez-Sanchez,<sup>b, c</sup> E. Ismailova,<sup>b</sup> G. G. Malliaras,<sup>b, c</sup> and D. Mecerreyes<sup>\*a, d</sup>

<sup>a</sup> POLYMAT University of the Basque Country UPV/EHU, Joxe Mari Korta Center, Avda. Tolosa 72, 20018 Donostia-san Sebastian, Spain.

<sup>b</sup> Department of Bioelectronics, Ecole Nationale Supérieure des Mines, CMP-EMSE, MOC, 13541 Gardanne, France.

<sup>c</sup> Current address: Electrical Engineering Division, Department of Engineering, University of Cambridge, 9 JJ Thomson Avenue, Cambridge, CB3 0FA, United Kingdom

<sup>d</sup> Ikerbasque, Basque Foundation for Science, E-48011 Bilbao, Spain.

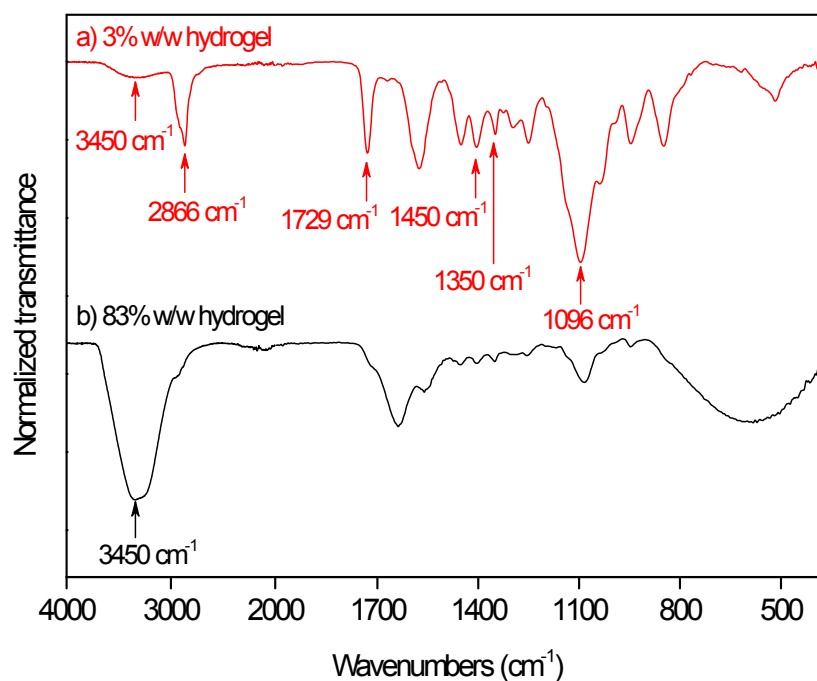

Figure S1. FTIR-ATR spectra of (a) 3% w/w hydrogel and (b) 83% w/w hydrogel.

To determine if un-reacted monomers were left in the hydrogels, we designed a simple <sup>1</sup>H-NMR spectroscopy experiment. The as-synthesized hydrogels were immersed for 24h in deuterated water. Then, the hydrogels were separated from the deuterated water and the latter was measured by <sup>1</sup>H-NMR spectroscopy. The <sup>1</sup>H-NMR spectrum of deuterated water should reveal traces of the un-reacted monomers. As it can be seen in from the bottom spectrum of figure S2, the characteristic signals of the monomers at 6.0 – 6.5 ppm disappeared. Therefore confirming complete hydrogel polymerization.

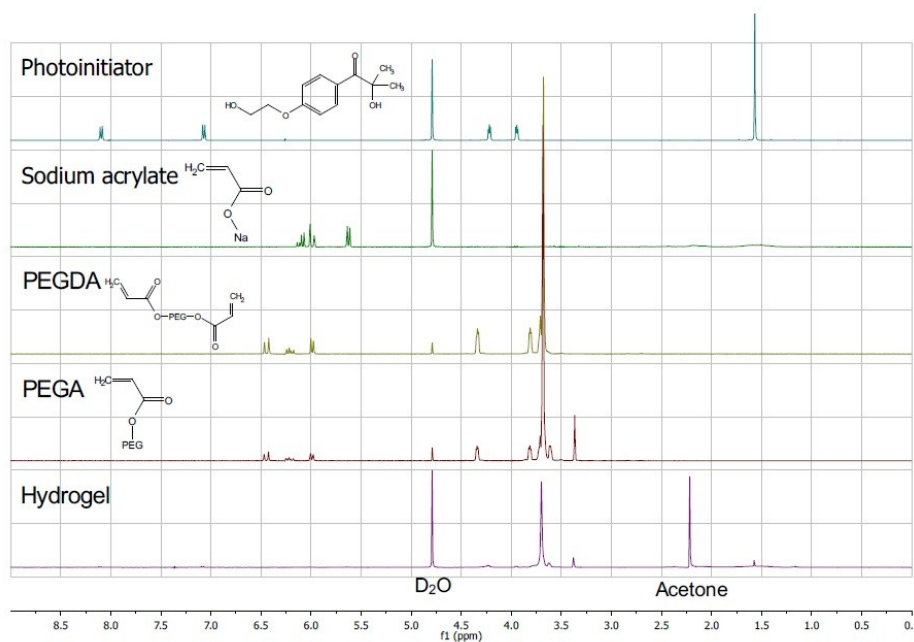

FIGURE S2. <sup>1</sup>H-NMR spectra in D<sub>2</sub>O of 2-hydroxy-4'-(2-hydroxyethoxy)-2-methylpropiophenone, sodium acrylate, poly(ethylene glycol) diacrylate, poly(ethylene glycol) acrylate, and the <sup>1</sup>H-NMR spectrum of D<sub>2</sub>O put in contact with an as-synthesized hydrogel during a period of 24 hours.

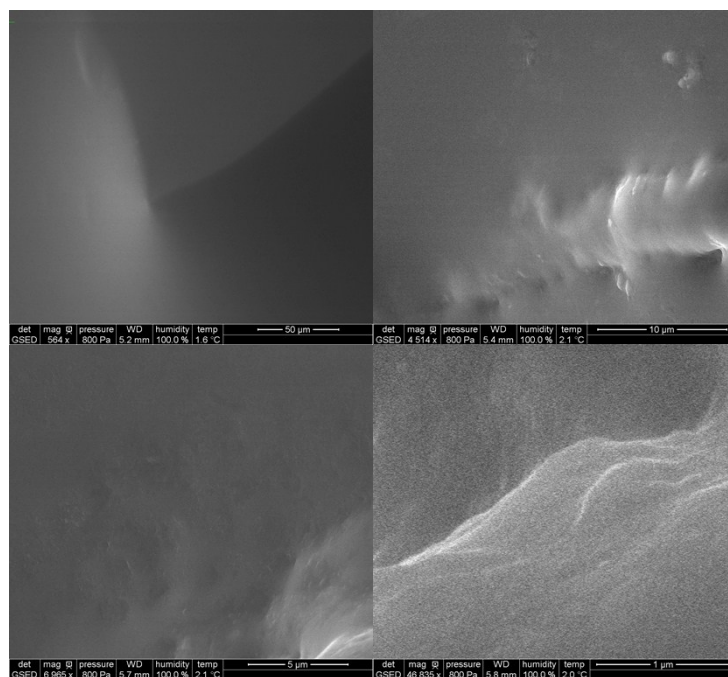

Figure S3. Environmental SEM picture of a 83% w/w hydrogel obtained at 100% relative humidity.

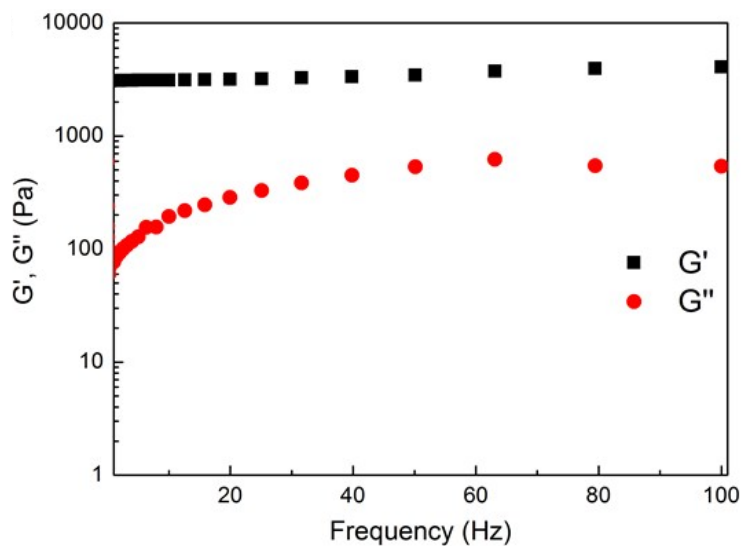

Figure S4. Rheological behavior of a 83% w/w hydrogel. Evolution of  $G'$  (squares)  $G''$  (circles) as function of frequency.

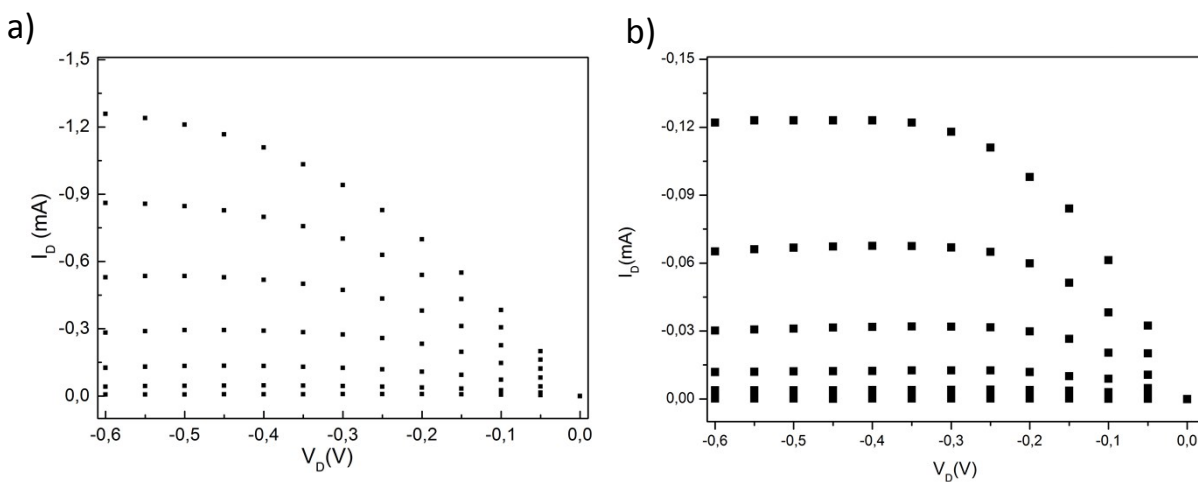

FIGURE S5. OECT IV output characteristics with the hydrogel and an aqueous NaCl 0.1M as electrolytes. (a) hydrogel IV output characteristics over the range of  $V_G=0$  V to 0.6 V, with a  $V_G$  step size of 0.05 V, (b) NaCl 0.1M solution IV output characteristics over the range of  $V_G=0$  V to 0.6 V, with a  $V_G$  step size of 0.05 V.
